# Supplementary material
Source: PubMed Central journal article supplement (PMC2804029)
Supplement: NIHMS158548-supplement-1_si_001.pdf [file NIHMS158548-supplement-1_si_001.pdf]

## SUPPORTING INFORMATION

### **Structural Studies of Pterin-Based Inhibitors of Dihydropteroate Synthase**

Kirk E. Hevener<sup>†¶</sup>, Mi-Kyung Yun<sup>†¶</sup>, Jianjun Qi<sup>†</sup>, Iain D. Kerr<sup>‡</sup>, Kerim Babaoglu<sup>‡</sup>, Julian G. Hurdle<sup>‡</sup>, Kanya Balakrishna<sup>‡</sup>, Stephen W. White<sup>‡§\*</sup>, Richard E. Lee<sup>‡¶\*</sup>

<sup>†</sup> Department of Pharmaceutical Sciences, University of Tennessee Health Science Center, 847 Monroe Ave, Rm327 Johnson Bldg, Memphis, TN 38163

<sup>‡</sup> Department of Chemical Biology and Therapeutics, St Jude Children's Research Hospital, 262 Danny Thomas Place, Mail Stop 1000, Memphis, TN 38105.

<sup>‡</sup> Department of Structural Biology, St Jude Children's Research Hospital, Memphis, TN 38105

<sup>§</sup> Department of Molecular Sciences, University of Tennessee Health Science Center, 658 Madison Ave, G01 Molecular Science Bldg, Memphis, TN 38163

<sup>¶</sup> These authors contributed equally to this work

\* Authors to whom correspondence should be addressed.

**SWW:** Department of Structural Biology, St Jude Children's Research Hospital, Memphis, TN 38105. Tel: (901) 595 3040; Email: [stephen.white@stjude.org](mailto:stephen.white@stjude.org)

**REL:** Department of Chemical Biology and Therapeutics, St Jude Children's Research Hospital, 262 Danny Thomas Place, Mail Stop 1000, Memphis, TN 38105. Tel: (901) 595 6617; Email: [Richard.Lee@stjude.org](mailto:Richard.Lee@stjude.org)

## CONTENTS

|                                                                                                                                |    |
|--------------------------------------------------------------------------------------------------------------------------------|----|
| Figure S1 UNITY pharmacophore filters applied to DHPS. a) Surface volume constraint.<br>b) Donor and Acceptor Constraints..... | 3  |
| Figure S2 Unity query # 1, Maybridge database.....                                                                             | 4  |
| Figure S3 Unity query #2, NCI database.....                                                                                    | 4  |
| Scheme S1 Synthetic Scheme and methods for compounds <b>2</b> and <b>4</b> .....                                               | 5  |
| Table S1 Statistics of data collection.....                                                                                    | 9  |
| Table S2 Statistics of refinement.....                                                                                         | 10 |

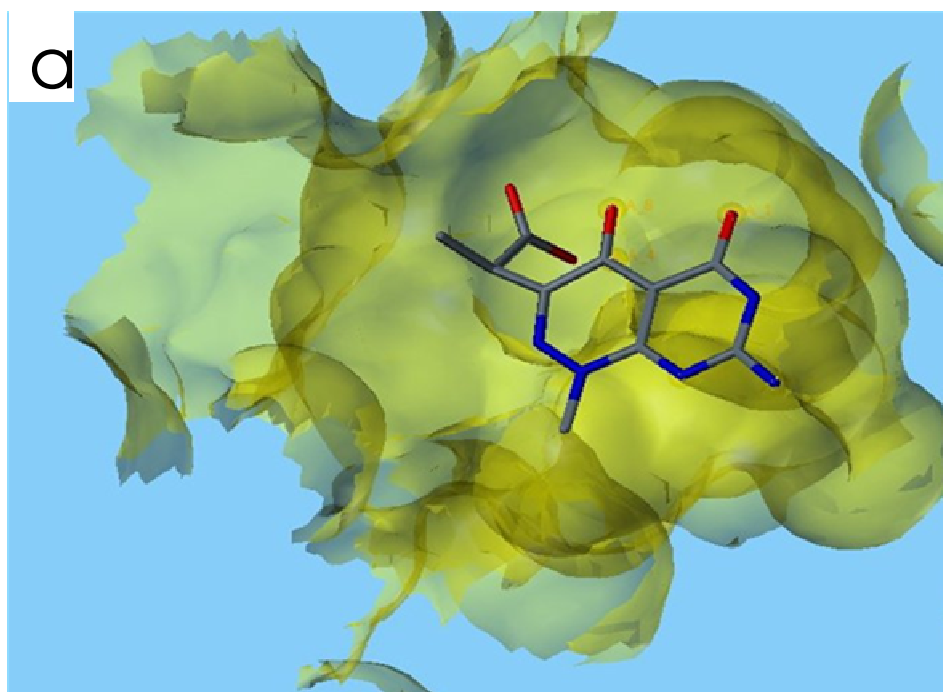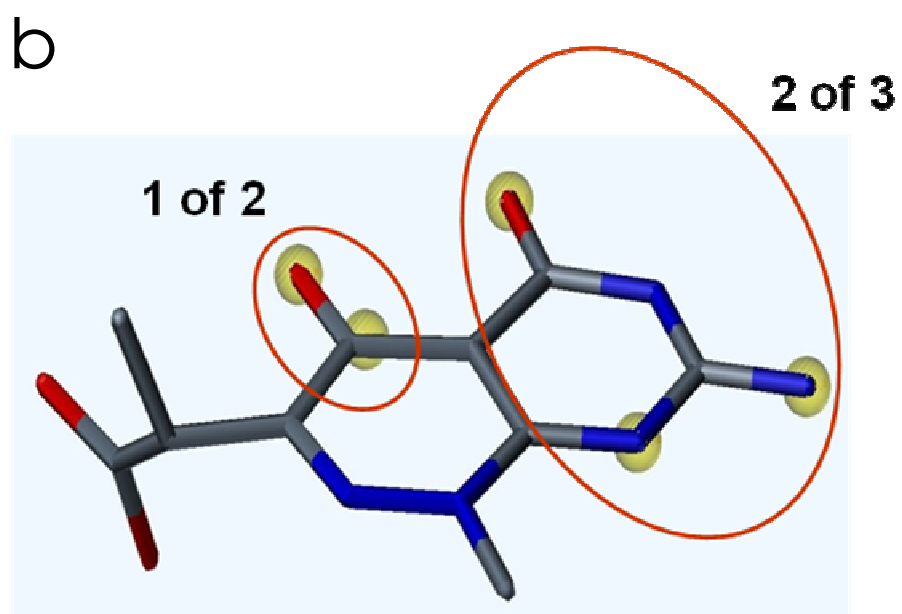

Figure S1 UNITY pharmacophore filters applied to DHPS. a) Surface volume constraint. b) Donor and Acceptor Constraints.

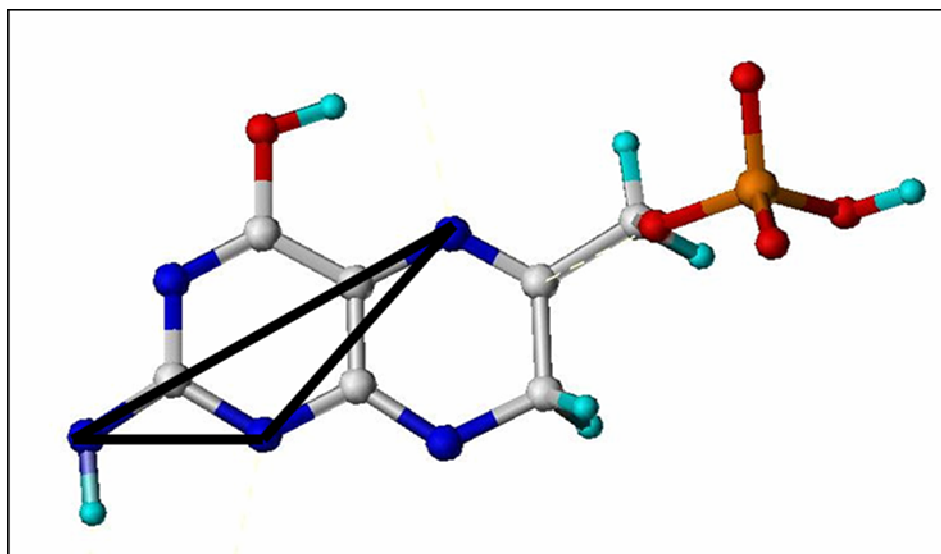

Figure S2 Unity query #1, Maybridge database.

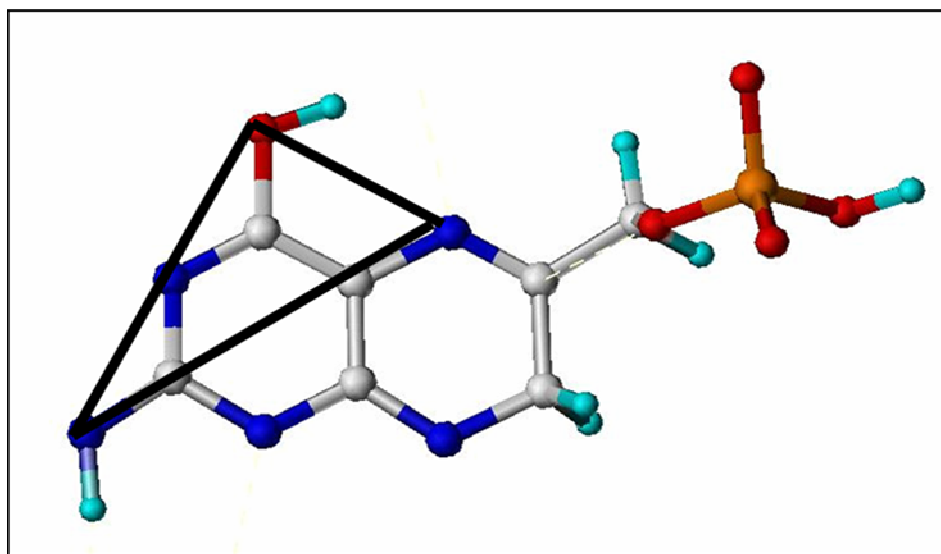

Figure S3 Unity query #2, NCI database.

Scheme S1

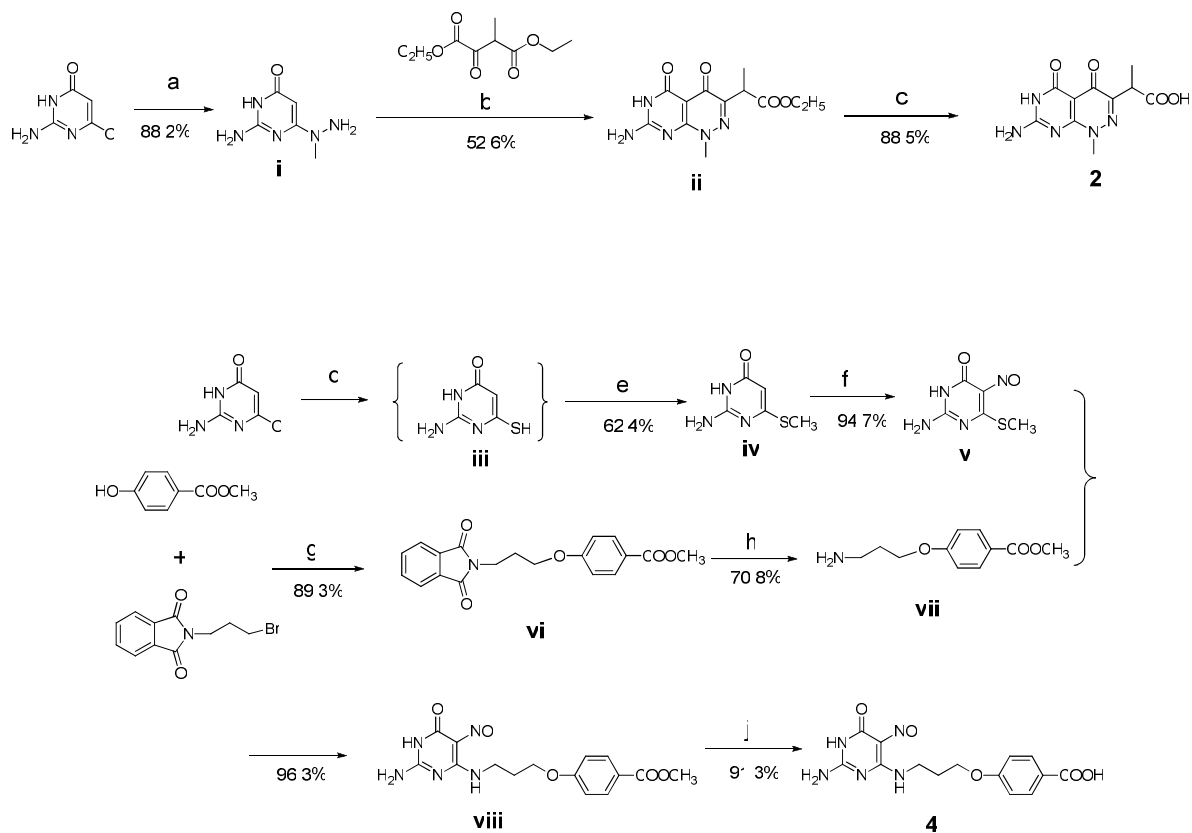

Conditions and reagents: a)  $\text{CH}_3\text{NHNH}_2$ ,  $\text{H}_2\text{O}$ , reflux, 3h; b) Methyl oxoacetate, Ethyl Ester,  $\text{H}_2\text{O}$ , reflux, 3h; c) (1) 5% NaOH, THF, RT, overnight; (2) 1N HCl; d) NaHS,  $(\text{CH}_2\text{OH})_2$ ,  $135^\circ\text{C}$ , 6h; e)  $\text{CH}_3\text{SCH}_2\text{COCH}_3$ , 1N NaOH, 50% EtOH, RT, 3h; f)  $\text{NaNO}_2$ ,  $\text{H}_2\text{O}$ ,  $40^\circ\text{C}$ , 2N AcOH, 2h; g) NaH, DMSO, RT, 70h; h) 55%  $\text{NH}_2\text{NH}_2$ , MeOH, reflux, 4h; i) MeOH, reflux, 20h; j) (1) 0.5N NaOH, RT, overnight; (2) 1N HCl.

Scheme S1 Synthesis scheme utilized in the synthesis of the known DHPS inhibitors 2 & 4.

## Synthesis Methods

General Methods: The reactions were monitored by thin layer chromatography (TLC) on pre-coated Merck 60 F<sub>254</sub> silica gel plates and visualized by UV detection. All <sup>1</sup>H and <sup>13</sup>C NMR spectra were recorded on a Bruker ARX-300 or Varian INOVA-500 spectrometers. Chemical shifts are reported in ppm (δ) relative to residual solvent peak or internal standard (tetramethylsilane) and coupling constants (J) are reported in hertz (Hz). Mass spectra were recorded on a Bruker Esquire LC/MS using ESI.

The synthesis schemes for compounds **2** & **4** is described in Scheme S1, the experimental methods and analytical data follows:

### *2-amino-6-(1-methylhydrazinyl)pyrimidin-4(3H)-one (i)*

To a mixture of 2-Amino-4-chloro-6-hydroxypyrimidine (3.50g, 24.14mmol) in water (180ml) was added methylhydrazine (5.40g, 117.14mmol) and refluxed for 3h. The reaction solution was cooled to room temperature and filtered to give crystal **i**, 3.30g, yield 88.2%. <sup>1</sup>HNMR (DMSO-d<sub>6</sub>, 300MHz) δ 9.70 (s, 1H), 6.20 (s, 2H), 4.95 (s, 1H), 4.45 (ss, 2H), 3.10 (s, 3H). <sup>13</sup>CNMR (DMSO-d<sub>6</sub>, 75MHz) δ 165.86, 163.10, 154.21, 92, 75.84. MS (ESI): 178.2 (M<sup>++</sup> Na).

### *Ethyl 2-(7-amino-1-methyl-4,5-dioxo-1,4,5,6-tetrahydropyrimido(4,5-c)pyridazin-3-yl)propanoate (ii)*

To a mixture of **i** (3.00g, 19.35mmol) in water (150ml) was added Methyloxalacetic Acid Diethyl Ester (7.80g, 38.61mmol). The reaction mixture was refluxed for 3h, then cooled to 70°C and filtered to give white solid **6** 2.98g, yield 52.6%. <sup>1</sup>HNMR (DMSO-d<sub>6</sub>, 300MHz) δ 10.9 (s, 1H), 4.05 (q, 2H, J=Hz), 3.78 (q, 1H, J=7.5Hz), 3.75 (s, 3H), 1.32 (3H, d, J=7.0Hz), 1.15 (3H, t, J=7.5Hz). MS (ESI): 316.3 (M<sup>++</sup>Na).

### *2-(7-amino-1-methyl-4,5-dioxo-1,4,5,6-tetrahydropyrimido(4,5-c)pyridazin-3-yl)propanoic acid (2)*

To a solution of **ii** (0.3g, 1.02mmol) in THF(10ml) was added 5% NaOH solution (7ml) at RT and stirred overnight, followed by solvent evaporation. The resulting solution was acidified with 1N HCl to pH 4~5 and filtered to give white solid **2** 239mg, yield 88.5%.

<sup>1</sup>HNMR (DMSO-d<sub>6</sub>, 500MHz) δ 10.96 (s, 1H), 3.82 (q, 1H, J=7.0Hz), 3.78 (s, 3H), 1.33 (d, 3H, J=7.0Hz). <sup>13</sup>CNMR (75MHz, DMSO-d<sub>6</sub>) δ 173.68, 166.78, 159.42, 157.44, 155.38, 154.42, 100.68, 40.88, 40.00, 14.17. MS (ESI): 288 (M<sup>+</sup>+Na)

#### *2-amino-6-(methylthio)pyrimidin-4(3H)-one (iv)*

To a solution of 2-Amino-4-chloro-6-hydroxypyrimidine (3.0g, 21mmol) in ethane-1,2-diol (12ml) was added NaHS (4.8g, 86mmol), and slowly heated to 135°C and stirred for 6h. After cooling to RT, 30ml of EtOH and 15ml of acetic acid were added, and stirred overnight at RT. The reaction mixture was filtered, washed with EtOH to give yellow solid **iii** 3.1g which was directly used in the next step reaction without further purification. To a solution of above product (21mmol) in 1N NaOH (18ml) and 50% EtOH (60ml) was added CH<sub>3</sub>I (3.1g, 22mmol) and stirred for 3h at RT, filtered, the solid was washed with water to give yellow solid **iv** 2.03g, yield 62.4%. <sup>1</sup>HNMR (DMSO-d<sub>6</sub>, 500MHz) δ 10.56 (1H, s), 6.58 (2H, s), 5.36 (1H, s), 2.32 (3H, s). MS (ESI) m/z: 158 (M<sup>+</sup>+1).

#### *2-amino-6-(methylthio)-5-nitrosopyrimidin-4(3H)-one (v)*

A mixture of **iv** (1.59g, 10.13mmol) and NaNO<sub>2</sub> (1.55g, 22.46mmol) in water (30ml) was stirred at 40°C to allow for dissolution. Then to this mixture was added 2N AcOH (15ml) slowly maintaining the temperature at 40°C. The reaction mixture was then kept stirring for 2h at 40°C, cooled to RT, filtered, washed with water to give blue solid **v** 1.78g, yield 94.7%. <sup>1</sup>H NMR (DMSO-d<sub>6</sub>, 300MHz) δ 11.61 (1H, s), 8.71 (1H, s), 7.38 (1H, s), 2.26 (3H, s). MS (ESI) m/z: 185 (M<sup>+</sup>).

#### *Methyl 4-(3-(1,3-dioxisoindolin-2-yl)propoxy)benzoate (vi)*

400mg (90%, 66.67mmol) of NaH was slowly added to DMSO (20ml). To this basic reaction solution was added a solution of Methyl 4-hydroxybenzoate (2.28g, 15mmol) in DMSO (15ml) and stirred for 3h at RT. Then a solution of N-(3-Bromopropyl)phthalimide (4.0g, 15mmol) in DMSO(13ml) was added dropwise at RT. The reaction mixture was kept stirring for 70h, quenched the reaction solution with water, filtered, washed with water

to give white solid **vi**, 4.54g, yield 89.3%. <sup>1</sup>HNMR (CDCl<sub>3</sub>, 300MHz) δ 7.94 (2H, d, J=9.0Hz), 7.84 (2H, dd, J<sub>1</sub>=5.0Hz, J<sub>2</sub>= 3.0Hz), 7.72 (2H, dd, J<sub>1</sub>=5.0Hz, J<sub>2</sub>=3.0Hz), 6.80 (2H, d, J=9.0Hz), 4.09 (2H, t, J=6.5Hz), 3.92 (2H, t, J=6.5Hz), 3.90 (s, 3H), 2.21 (2H, m).

*Methyl 4-(3-aminopropoxy)benzoate (vii)*

To a solution of **vi** (340mg, 1.0mmol) in MeOH (10ml) was added 55% hydrazine (116mg) and refluxed for 4h, then extracted with EtOAc and washed with 1N NaOH, water, dried over Na<sub>2</sub>SO<sub>4</sub> and evaporated to give oil **vii** 148mg, yield 70.8%. <sup>1</sup>HNMR (CDCl<sub>3</sub>, 500MHz) δ 7.98 (2H, d, J=8.5Hz), 6.91 (2H, d, 9.0Hz), 4.11 (2H, t, J=6.5Hz), 3.88 (3H, s), 2.922 (2H, t, 7.0Hz), 1.95 (2H, m), 1.28 (br, 2H). MS (ESI) m/z: 210 (M<sup>++</sup>H).

*Methyl 4-(3-(2-amino-5-nitroso-6-oxo-1,6-dihydropyrimidin-4-ylamino)propoxy)benzoate (viii)*

To a solution of **vii** (140mg, 0.67mmol) in MeOH (12ml) was added **10** (125mg, 0.67mmol) and refluxed for 20h, cooled to RT, and filtered, washed with MeOH to give tan powder solid **15** 224mg, yield 96.3%. <sup>1</sup>H NMR (DMSO-d<sub>6</sub>, 500MHz) δ 12.60 (1H, s), 10.82 (1H, s), 8.21 (1H, s), 7.91 (2H, d, J=9.0Hz), 7.11 (2H, d, J=9.0Hz), 6.91 (1H, s), 4.11 (2H, t, J=6.0Hz), 3.71 (s, 3H), 3.58 (2H, m) 2.02 (2H, m), MS (ESI) m/z: 346 (M<sup>-</sup>).

*4-(3-(2-amino-5-nitroso-6-oxo-1,6-dihydropyrimidin-4-ylamino)propoxy)benzoic acid(4)*

170mg (0.49mmol) of **vii** was dissolved in 0.5N NaOH solution (4ml) and stirred overnight at RT, then acidified by 1N HCl and filtered, washed with water to give tan powder solid **16** 152mg, yield 91.3%. <sup>1</sup>HNMR (MDSO-d<sub>6</sub>, 500MHz) 12.60 (1H, t, J=5.5Hz), 10.83 (1H, s), 8.24 (1H, s), 7.89 (2H, d, J=8.5Hz), 7.08 (2H, d, J=9.0Hz), 6.91 (1H, s), 4.09(2H, t, J=6.0Hz), 3.58 (2H, m), 2.02 (2H, m). MS (ESI) m/z: 334(M<sup>++</sup>H).



**Table S1 Statistics of data collection.**

| Parameter                         | Compound 2          | Compound 3         | Compound 4         | Compound 5         | Compound 6         | Compound 7         |
|-----------------------------------|---------------------|--------------------|--------------------|--------------------|--------------------|--------------------|
| Space group                       | P6 <sub>2</sub> 22  | P6 <sub>2</sub> 22 | P6 <sub>2</sub> 22 | P6 <sub>2</sub> 22 | P6 <sub>2</sub> 22 | P6 <sub>2</sub> 22 |
| Unit cell dimensions (Å)<br>a,b,c | 97.5, 97.5, 263.8   | 98.8, 98.8, 263.9  | 96.8, 96.8, 263.6  | 97.5, 97.5, 264.0  | 97.9, 97.9, 262.9  | 97.5, 97.5, 261.6  |
| Resolution range(Å) <sup>a</sup>  | 50.0-2.32(2.4-2.32) | 50.0-2.3(2.38-2.3) | 50.0-2.1(2.18-2.1) | 80.3-2.4(2.53-2.4) | 84.8-2.5(2.64-2.5) | 50.0-2.4(2.49-2.4) |
| R <sub>sym</sub> <sup>ab</sup>    | 0.057(0.206)        | 0.070(0.208)       | 0.094(0.347)       | 0.065(0.280)       | 0.091(0.281)       | 0.087(0.171)       |
| I/σ <sup>a</sup>                  | 40.0(4.7)           | 35.9(9.6)          | 29.7(2.0)          | 23.0(6.3)          | 19.6(4.6)          | 33.9(11.5)         |
| Completeness(%) <sup>a</sup>      | 92.2(57.6)          | 89.0(52.0)         | 96.5(89.6)         | 100.0(100.0)       | 98.7(92.3)         | 90.2(54.1)         |
| Redundancy <sup>a</sup>           | 8.0(5.9)            | 12.3(9.4)          | 13.5(6.4)          | 10.9(11.1)         | 11.4(7.7)          | 11.1(8.7)          |
| Unique reflectionos               | 30,565              | 30,569             | 41,961             | 30,034             | 26,335             | 27,556             |

  

| Parameter                         | Compound 10        | Compound 11        | Compound 16        | Compound 17        | Compound 18        | Compound 19        |
|-----------------------------------|--------------------|--------------------|--------------------|--------------------|--------------------|--------------------|
| Space group                       | P6 <sub>2</sub> 22 |
| Unit cell dimensions (Å)<br>a,b,c | 97.7, 97.7, 263.6  | 98.1, 98.1, 263.9  | 99.3, 99.3, 264.4  | 99.2, 99.2, 262.1  | 98.3, 98.3, 263.1  | 99.3, 99.3, 263.1  |
| Resolution range(Å) <sup>a</sup>  | 50.0-2.4(2.49-2.4) | 50.0-2.0(2.07-2.0) | 50.0-2.2(2.28-2.2) | 50.0-2.3(2.38-2.3) | 50.0-2.4(2.49-2.4) | 50.0-2.6(2.69-2.6) |
| R <sub>sym</sub> <sup>ab</sup>    | 0.101(0.309)       | 0.102(0.346)       | 0.099(0.350)       | 0.113(0.326)       | 0.049(0.132)       | 0.066(0.160)       |
| I/σ <sup>a</sup>                  | 19.0(1.6)          | 32.3(3.1)          | 29.4(3.6)          | 26.5(4.6)          | 47.5(10.8)         | 38.2(7.1)          |
| Completeness(%) <sup>a</sup>      | 88.5(58.2)         | 94.2(60.8)         | 97.7(91.7)         | 89.8(56.2)         | 91.5(57.9)         | 93.9(62.0)         |
| Redundancy <sup>a</sup>           | 7.6(2.9)           | 11.5(6.7)          | 12.0(7.7)          | 10.5(6.0)          | 11.9(8.4)          | 11.9(7.2)          |
| Unique reflectionos               | 26,492             | 48,615             | 39,203             | 30,988             | 27,831             | 22,826             |

<sup>a</sup> Values in parentheses refer to the highest resolution shell.

<sup>b</sup> R<sub>sym</sub> =  $\sum |I - \langle I \rangle| / \sum \langle I \rangle$ , where  $I$  is the observed intensity.

**TableS 2 Statistics of refinement.**

| Parameter                                          | Compound 2  | Compound 3    | Compound 4    | Compound 5    | Compound 6    | Compound 7    |
|----------------------------------------------------|-------------|---------------|---------------|---------------|---------------|---------------|
| Resolution range(Å)                                | 50.0-2.32   | 50.0-2.4      | 50.0-2.2      | 50.0-2.5      | 50.0-2.5      | 50-2.4        |
| No. of reflection                                  | 28,987      | 27,239        | 35,180        | 25,244        | 24,997        | 25,876        |
| Completeness(%)                                    | 92.2        | 93.2          | 97.3          | 99.9          | 100.0         | 91.5          |
| R <sub>work</sub> / R <sub>free</sub> <sup>c</sup> | 0.205/0.264 | 0.221 / 0.268 | 0.217 / 0.279 | 0.224 / 0.269 | 0.236 / 0.278 | 0.225 / 0.280 |
| No. of atoms                                       |             |               |               |               |               |               |
| Protein                                            | 4,050       | 4,165         | 4,176         | 4,073         | 4,138         | 4,169         |
| Non-protein                                        | 199         | 134           | 303           | 147           | 156           | 164           |
| Mean B overall (Å <sup>2</sup> )                   | 61          | 67            | 53            | 69            | 47            | 59            |
| Rmsd from ideal values                             |             |               |               |               |               |               |
| Bond lengths(Å)                                    | 0.022       | 0.019         | 0.021         | 0.022         | 0.007         | 0.012         |
| Bond angles(°)                                     | 1.872       | 1.862         | 1.909         | 2.116         | 1.071         | 1.302         |
| Ramachandran plot                                  |             |               |               |               |               |               |
| Most favored region(%)                             | 91.4        | 92.3          | 91.5          | 90.7          | 90.9          | 92.5          |
| Additional allowed region(%)                       | 8.4         | 7.5           | 8.5           | 9.1           | 8.6           | 7.5           |
| Generously allowed region(%)                       | 0.2         | 0.2           | 0.0           | 0.2           | 0.4           | 0.0           |
| Disallowed region(%)                               | 0.0         | 0.0           | 0.0           | 0.0           | 0.0           | 0.0           |

**Table S2, Cont. Statistics of Refinement**

| Parameter                        | Compound 10   | Compound 11   | Compound 16   | Compound 17   | Compound 18   | Compound 19   |
|----------------------------------|---------------|---------------|---------------|---------------|---------------|---------------|
| Resolution range(Å)              | 50.0-2.6      | 50.0-2.0      | 50.0-2.2      | 50.0-2.3      | 50.0-2.4      | 50.0-2.7      |
| No. of reflection                | 24,151        | 46,100        | 37,178        | 29,375        | 25,193        | 20,296        |
| Completeness(%)                  | 94.8          | 94.2          | 97.8          | 89.8          | 87.3          | 97.3          |
| $R_{work}/R_{free}^c$            | 0.246 / 0.298 | 0.204 / 0.238 | 0.205 / 0.247 | 0.203 / 0.265 | 0.208 / 0.268 | 0.271 / 0.311 |
| No. of atoms                     |               |               |               |               |               |               |
| Protein                          | 4,022         | 4,137         | 4,100         | 4,102         | 4,090         | 3,996         |
| Non-protein                      | 110           | 329           | 257           | 233           | 135           | 73            |
| Mean B overall (Å <sup>2</sup> ) | 60            | 40            | 54            | 65            | 64            | 50            |
| Rmsd from ideal values           |               |               |               |               |               |               |
| Bond lengths(Å)                  | 0.025         | 0.013         | 0.020         | 0.022         | 0.023         | 0.022         |
| Bond angles(°)                   | 2.148         | 1.310         | 1.741         | 1.970         | 1.993         | 2.127         |
| Ramachandran plot                |               |               |               |               |               |               |
| Most favored region(%)           | 86.3          | 93.8          | 92.9          | 92.0          | 90.0          | 83.1          |
| Additional allowed region(%)     | 13.4          | 6.2           | 6.9           | 8.0           | 10.0          | 16.3          |
| Generously allowed region(%)     | 0.2           | 0.0           | 0.0           | 0.0           | 0.0           | 0.7           |
| Disallowed region(%)             | 0.0           | 0.0           | 0.2           | 0.0           | 0.0           | 0.0           |

<sup>c</sup>  $R_{free}$  is the R value obtained for a test set of reflections consisting of randomly selected 5% subset of the data set excluded from refinement.
